# Supplementary material for: SMARCC1 expression is positively correlated with pathological grade and good prognosis in renal cell carcinoma
Source: PubMed Central journal article supplement — Transl Androl Urol. 2021 Jan;10(1):236–42. doi: 10.21037/tau-20-935 (PMC7844531; doi:10.21037/tau-20-935), 2021-01
Supplement: tau-10-01-236-dss.pdf [file tau-10-01-236-dss.pdf]

## Data Sharing Statement

|                     |                                                                                                                                                     |                                                                                                                                     |
|---------------------|-----------------------------------------------------------------------------------------------------------------------------------------------------|-------------------------------------------------------------------------------------------------------------------------------------|
| <b>Article Info</b> | <a href="http://dx.doi.org/10.21037/tau-20-935">http://dx.doi.org/10.21037/tau-20-935</a> .                                                         |                                                                                                                                     |
| <b>Item</b>         | <b>Question</b>                                                                                                                                     | <b>Authors' Response<br/>(place - if not applicable)</b>                                                                            |
| 1                   | Would you like to share data collected for your study to others?                                                                                    | Yes                                                                                                                                 |
| 2                   | If not, would you like to share the reason for your decision?                                                                                       |                                                                                                                                     |
| 3                   | What data in particular will be shared?                                                                                                             | The section of results.                                                                                                             |
| 4                   | Any other documents will be shared? Such as study protocol, statistical analysis plan, informed consent form, clinical study report, analytic code. | No                                                                                                                                  |
| 5                   | When will data availability begin?                                                                                                                  | After the article is online.                                                                                                        |
| 6                   | When will data availability end?                                                                                                                    | In two years.                                                                                                                       |
| 7                   | To whom will you share the data?                                                                                                                    | Urologists                                                                                                                          |
| 8                   | For what type of analysis or purpose?                                                                                                               | For review                                                                                                                          |
| 9                   | How or where can the data/documents be obtained?                                                                                                    | Emails could be sent to Qi Lv and the address below to obtain the shared data:<br>393212347@qq.com                                  |
| 10                  | Any other restrictions?                                                                                                                             | Full methods of data procurement and analysis are in the manuscript for independent study. Some unpublished data may not be shared. |
